# Supplementary material for: Colorimetric and “turn-on” fluorescent determination of Cu2+ ions based on rhodamine–quinoline derivative
Source: Royal Society of Chemistry journal article supplement (doi:10.1039/c2an36215e), 2012-01-01
Supplement: c2an36215e.pdf [file c2an36215e.pdf]

## Supplementary Information:

### Colorimetric and “turn-on” fluorescent determination of Cu<sup>2+</sup> ion based on rhodamine-quinoline derivative

Liang Feng,\* Hui Li, Yongjun Lv, Yafeng Guan\*

Laboratory of Instrumentation and Analytical Chemistry, Key Lab of Separation Science for Analytical Chemistry of CAS, Dalian Institute of Chemical Physics, CAS, Dalian, Liaoning 116023, P. R. China

(a)

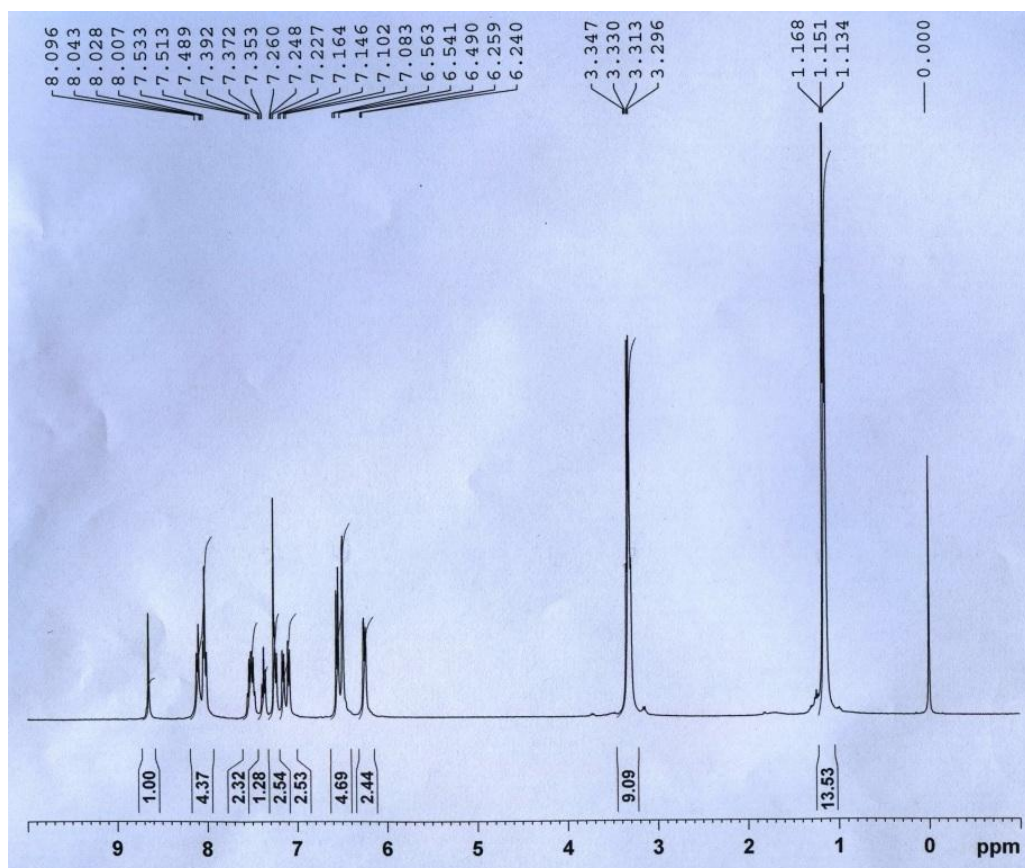

(b)

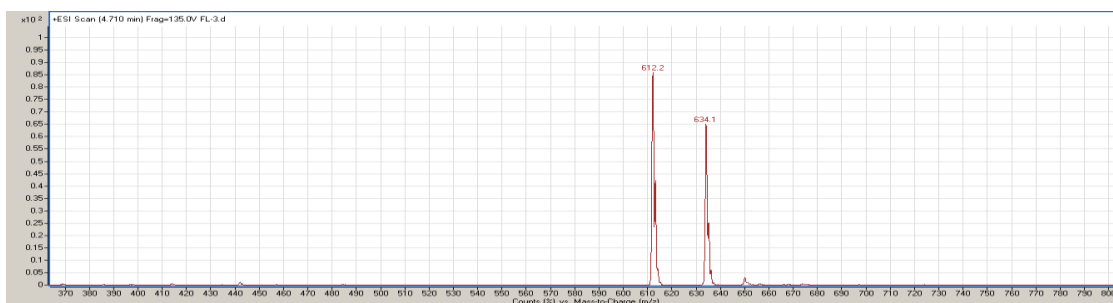

(c)

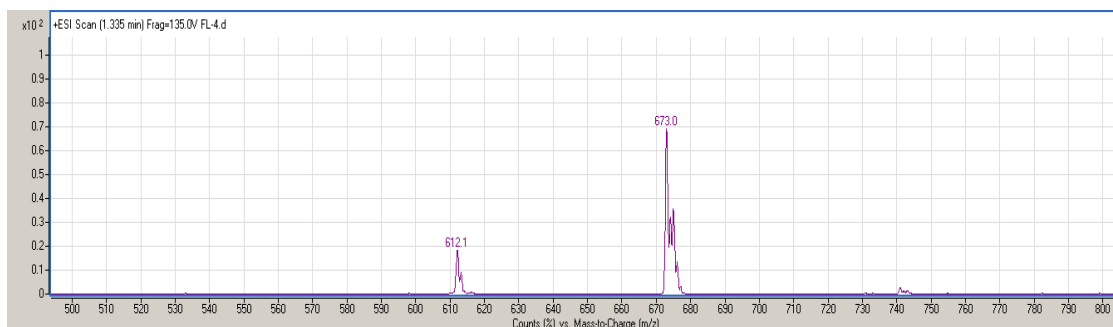

**Figure S1.**  $^1\text{H}$  NMR spectra of rhodamine-quinoline derivative **1**; b) ESI-MS spectrum of rhodamine-quinoline derivative **1**; c) ESI-MS spectrum of rhodamine-quinoline derivative **1**- $\text{Cu}^{2+}$  complex.

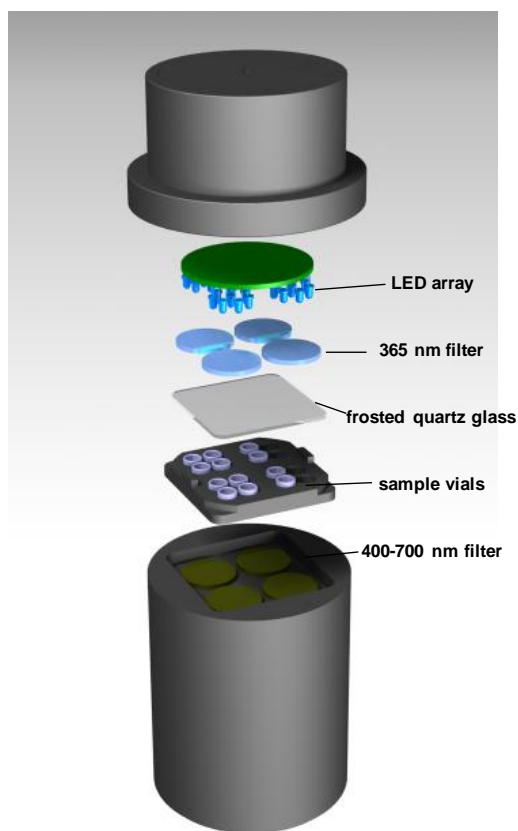

**Figure S2.** The schematic graph of the experimental set-up.

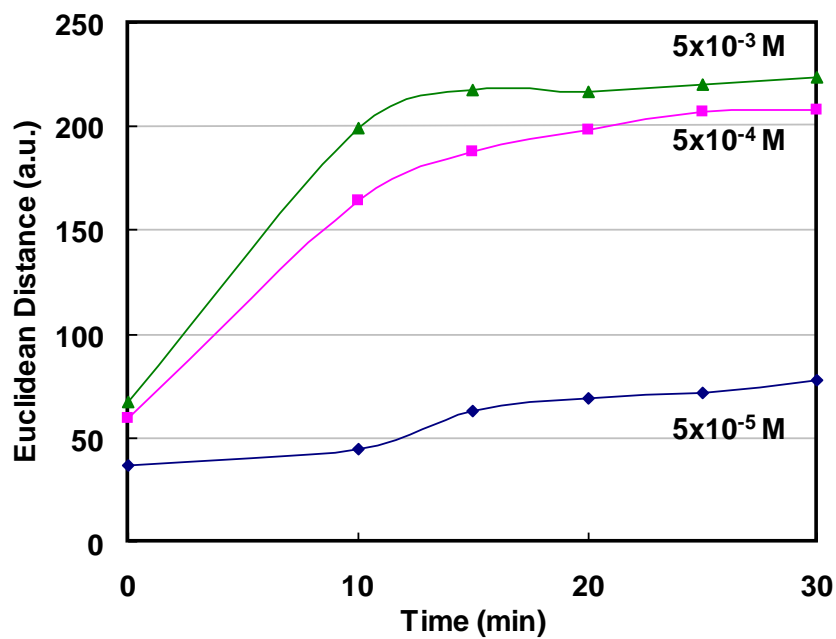

**Figure S3.** The reaction dynamic curves for colorimetric responses of  $\text{Cu}^{2+}$  at different concentrations.

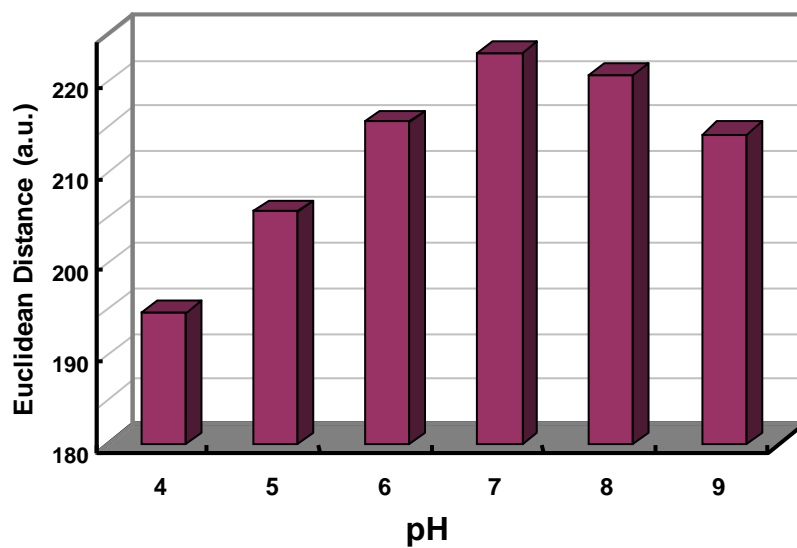

**Figure S4.** pH effect to the colorimetric responses of  $\text{Cu}^{2+}$ .

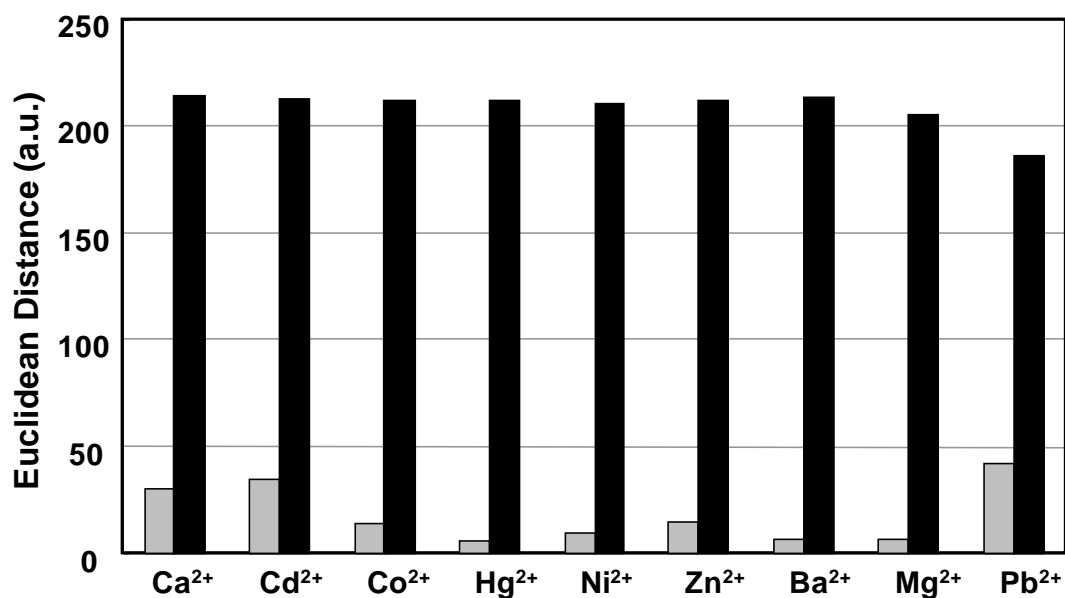

**Figure S5.** The colorimetric response of rhodamine-quinoline derivative. a) Black columns: rhodamine-quinoline derivative-Cu<sup>2+</sup> complex compound with the coexistence of nine different interferent ions; b) Grey columns: nine individual interferent ions without Cu<sup>2+</sup>.

**Table S1.** Summary of the parameters of ESI-MS.

|               | GA <sub>1</sub>                       | ABA | JA  | GA <sub>3</sub> | p-HCA |
|---------------|---------------------------------------|-----|-----|-----------------|-------|
| Parameters    | Polarity                              |     |     |                 |       |
|               | Negative                              |     |     |                 |       |
| of ion source | Capillary voltage (kV)                |     | 4   |                 |       |
|               | Nebulizer (psi)                       |     | 35  |                 |       |
|               | Nozzle voltage (V)                    |     | 500 |                 |       |
|               | Sheath gas flow (Lmin <sup>-1</sup> ) |     | 12  |                 |       |
|               | Sheath gas temperature (°C)           |     | 325 |                 |       |
|               | Gas flow (Lmin <sup>-1</sup> )        |     | 10  |                 |       |
|               | Gas heater (°C)                       |     | 250 |                 |       |
